# Supplementary material for: An Integration of Linkage Mapping and GWAS Reveals the Key Genes for Ear Shank Length in Maize
Source: MDPI journal article supplement (doi:10.3390/ijms232315073), 2022-12-01
Supplement: s1 [file s1]

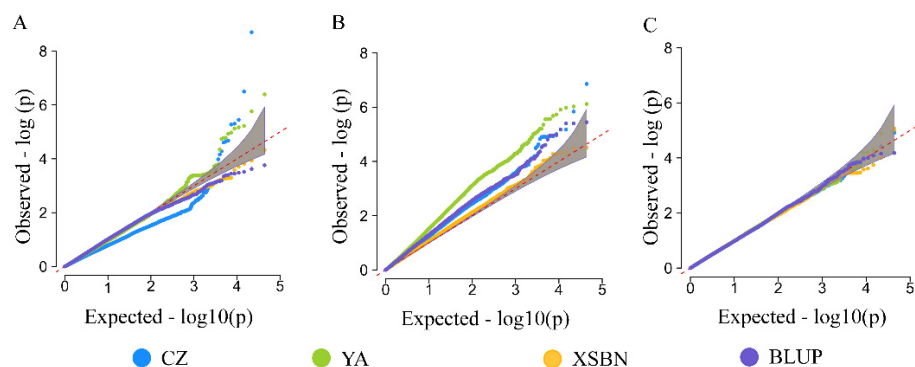

**Figure S1.** Q-Q plots resulting from three models for GWAS of ESL. (A) Q-Q plots of FarmCPU model; (B) Q-Q plots of GLM model; (C) Q-Q plots of MLM models.

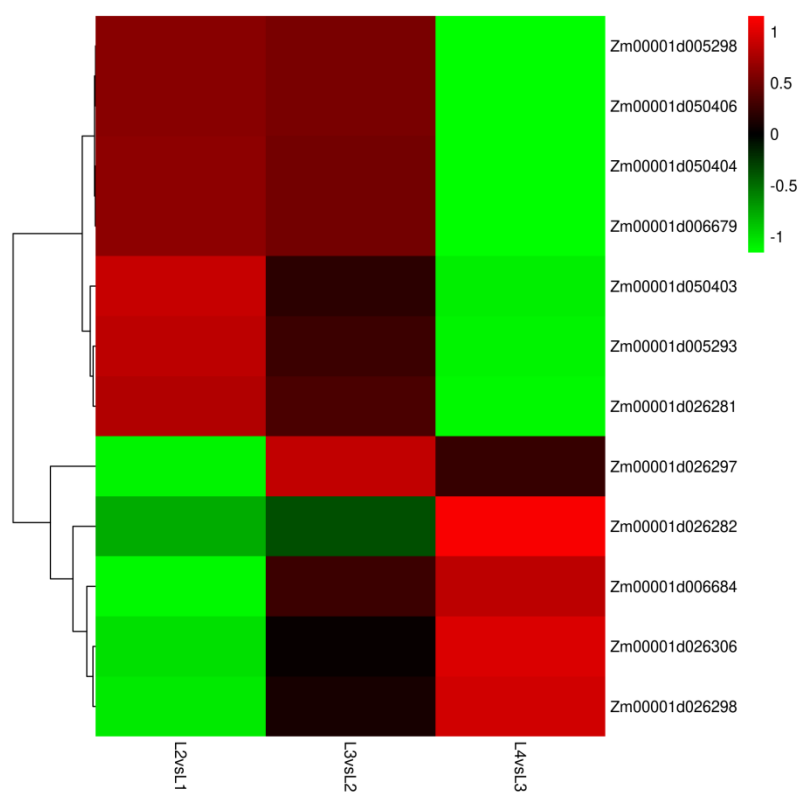

**Figure S2.** Heatmap of differentially expressed genes in four developmental periods
