# Supplementary material for: An Integration of Linkage Mapping and GWAS Reveals the Key Genes for Ear Shank Length in Maize
Source: Int J Mol Sci. 2022 Dec 1;23(23):15073. doi: 10.3390/ijms232315073 (PMC9740654; doi:10.3390/ijms232315073)
Supplement: Supplementary file 1 [file ijms-23-15073-s001.zip › Review_ESL.Table S1-S8 .xlsx]

## Sheet: Table S1
Table S1. QTL identified for SL across multiple environments.
QTL	Environment	Chromosome	Peak position (cM)	Physical position (Mb）	Interval (cM)	LOD	Add	PVE (%)
qESL1-1	XSBN	1	55.11	21.2-23.3	53.2-56.9	2.79	-0.48	4.43
qESL1-1	BLUP	1	57.21	22.875-23.675	55.6-58.2	5.83	-0.49	8.46
qESL1-1	YA	1	57.31	23.2-24.575	57-59.3	5.03	-0.57	7.17
qESL1-2	BLUP	1	68.41	33.2-33.9	68-68.8	2.53	0.31	3.39
qESL1-3	YA	1	251.51	296.2-297.2	248.8-252.5	2.64	0.42	3.49
qESL2-1	BLUP	2	107.41	147.6-165.05	104.8-108.2	2.57	0.32	3.43
qESL2-2	BLUP	2	147.91	207.075-209.2	146.4-149.8	2.57	-0.33	3.43
qESL2-3	BLUP	2	198.21	233.7-236.925	197.1-199.8	3.06	0.36	4.32
qESL3-1	YA	3	27.81	5.2-6.325	26.3-29.6	2.68	-0.41	3.55
qESL3-2	BLUP	3	62.41	27.5-32.825	60.9-64.1	2.58	-0.32	3.45
qESL4-1	BLUP	4	70.61	39.625-42.775	70.2-71.3	2.51	-0.36	3.84
qESL4-1	CZ	4	79.81	102.575-127.925	78.3-80.5	3.99	-0.68	6.25
qESL4-1	YA	4	79.81	121.25-127.775	79-80.4	5.22	-0.61	7.46
qESL4-1	BLUP	4	79.81	121.25-127.775	79-80.4	6.69	-0.56	9.8
qESL5-1	XSBN	5	65.71	35.825-41.1	65.2-67.7	3.45	-0.58	5.7
qESL5-1	BLUP	5	68.51	40.6-43.8	67.7-68.6	2.57	-0.34	3.63
qESL5-1	BLUP	5	73.61	65.35-68.425	73.3-74	2.78	-0.36	3.92
qESL5-1	XSBN	5	75.31	72.125-68.425	75-76	4.79	-0.7	7.87
qESL5-2	CZ	5	103.91	175.35-179.725	101.8-106.1	2.96	-0.56	4.6
qESL5-3	XSBN	5	155.51	211.15-212	153.3-157.5	3.05	0.52	4.86
qESL7-1	BLUP	7	62.51	124.95-126.925	60.5-64.3	3.11	0.4	4.13
qESL7-1	CZ	7	62.51	125.15-125.925	60.6-63.9	3.46	0.7	5.4
qESL7-1	YA	7	62.51	125.15-126.2	60.6-64.1	2.87	0.49	4.02
qSL7-2	BLUP	7	86.61	152.525-153.8	86-87.3	3.73	0.39	4.92
qSL7-2	BLUP	7	92.91	158.1-159.15	92.1-94.7	3.6	0.42	4.75
qESL8-1	YA	8	25.01	7.6-10.2	21.8-26	3.79	0.56	5.38
qESL8-1	BLUP	8	25.01	8.5-10.2	24.1-26	4.53	0.48	6.49
qESL10-1	YA	10	80.01	141.1-142.6	78.6-83	3.53	-0.49	4.99
Note: CZ, Chongzhou; YA, Ya'an; XSBN, Xishuangbanna; BLUP,Best linear unbiased prediction
QTL, quantitative trait locus.
LOD, the logarithm of the odds.
Add, additive effect.
PVE, phenotypci variations explained.

## Sheet: Table S2
Table S2. Significant SNPs detected by genome-wide association study
Number	SNP	Environment	Chromosome	Alleles	Position(bp)	P-value	PVE (%)
1	SYN23640	CZ	6	A/G	156879515	4.92×10-11	5.59
2	PZE-104073980	CZ	4	G/A	145870422	1.98×10-9	4.64
3	PZB02554.2	CZ	10	C/A	142190907	3.19×10-7	6.61
4	SYN23576	YA	2	A/G	49923876	0.41×10-6	7.85
5	PUT-163a-60337233-2343	YA	8	A/G	2516825	1.73×10-6	8.16
6	SYN17547	CZ	1	G/A	61018740	3.54×10-6	8.92
7	PZE-104052398	CZ	4	G/A	83198475	4.98×10-6	0.14
8	PZE-103120714	CZ	3	G/A	179073342	5.36×10-6	1.81
9	SYN24410	YA	6	A/C	162310549	6.03×10-6	0.15
10	PZE-110042836	YA	10	G/A	81715225	6.79×10-6	0.2
11	PZE-102047673	YA	2	A/G	25743273	7.58×10-5	2.63
12	PZE-105109045	YA	5	A/G	166319996	1.06×10-5	6.3
13	PZE-102119965	YA	2	A/G	163454655	1.18×10-5	3.53
14	PZE-101003785	YA	1	A/G	3665549	1.66×10-5	5.853
15	SYN34051	YA	7	C/A	168467680	1.68×10-5	0.433
16	PZE-102161136	YA	2	A/G	207151147	1.85×10-5	6.5
17	SYN30678	CZ	1	A/C	56074382	2.11×10-5	2.68
18	SYN19980	CZ	9	A/G	11454089	2.28×10-5	0.2
19	PUT-163a-71764007-3484	CZ	2	A/C	189633872	2.50×10-5	0.08
20	PZE-103162726	YA	3	A/C	213298419	4.55×10-5	0.42
21	PZE-104074620	XSBN	4	A/G	146508679	4.66×10-5	6.83
22	SYN39117	CZ	1	A/G	202300159	5.27×10-5	1.87
23	SYNGENTA10214	CZ	1	G/A	285137701	6.91×10-5	5.76
Note: CZ, Chongzhou; YA, Ya'an; XSBN, Xishuangbanna.
PVE, phenotypic variations explained.
SNP denotes single nucleotide polymorphism.

## Sheet: Table S3
Table S3. Distributions of the superior alleles of the significant SNPs in 30 maize elite lines
SNP	SYN23640	PZE-104073980	PZB02554.2	SYN17547	PZE-104052398	PZE-103120714	SYN30678	SYN19980	PUT-163a-71764007-3484	SYN39117	SYNGENTA10214	PZE-104074620	SYN23576	PUT-163a-60337233-2343	SYN24410	PZE-110042836	PZE-102047673	PZE-105109045	PZE-102119965	PZE-101003785	SYN34051	PZE-102161136	PZE-103162726	SUM
F06	0	1	0	0	0	1	0	1	0	0	0	0	1	1	1	0	1	0	0	0	0	0	1	8
Zheng58	0	0	1	0	0	1	0	1	0	0	0		0	0	0	1	0	0	1	0	0	0	0	5
S273	0	0	1	1	1	1	0	0	0	1	0	1	1	1	1	0	1	0	0	0	1	1	0	12
Mian723	0	0	1	0	0	1	0	1	0	1	0	1	0	0	0	0	1	0	1	0	0	1	1	9
Mo17	1	1	1	0	0	1	1	0	1	1	0	1	1	0	1	1	1	0	1	0	0	1	1	15
205-11	1	1	1	1	0	1	0	0	0	1	0	1	1	0	0	1	1	0	1	0	0	1	1	13
Chuan273	1	1	0	0	1	1	0	0	0	1	0	1	0	0	1	1	1	0	1	0	0	0	1	11
7854	0	0	1	0	0	1	0	0	0	1	0	1	0	0	0	1	0	0	0	0	0	1	1	7
Zheng22	0	1	1	1	1	1	0	0	0	1	0	1	0	0	0	1	0	0	1	0	1	0	1	11
Dan599	1	1	1	0	1	0	0	1	0	1	0	0	0	0	0	0	0	0	0	0	0	0	1	7
Ji1037	1	0	1	0	1	1	1	0	1	1	0	1	1	0	1	1	1	0	1	0	0	1	1	15
K22	0	0	1	0	0	1	0	0	0	1	0	0	0	0	0	1	1	0	1	0	0	0	1	7
Dan598	0	1	0	0	1	1	1	0	0	0	0	1	0	0	1	1	0	0	0	0	1	0	1	9
Shen137	1	1	1	1	1	0	1	0	0	1	0	1	0	1	1	1	0	0	1	0	1	0	1	14
871	1	0	1	0	0	1	0	1	0	1	0	0	0	0	1	0	0	0	1	0	0	0	1	8
Qi319	1	1	0	0	1	1	0	0	0	1	0	1	0	0	1	1	0	0	1	0	0	1	1	11
178	1	1	0	0	1	1	0	0	0	1	0	0	0	0	0	1	1	0	1	1	1	0	1	11
Qi205	0	0	1	0	1	1	0	0	0	1	0	0	0	0	1	0	1	0	0	0	0	0	1	7
Dan340	0	0	1	0	0	1	0	1	0	0	0	0	1	0	1	0	1	0	0	0	0	0	0	6
H921	1	1	1	0	1	1	0	1	0	1	0	1	1	0	1	1	0	0	1	0	0	0	1	13
1572	0	0	1	0	0	1	0	0	0	1	0	1	1	0	0	0	1	0	0	0	0	0	1	7
HuangC	0	1	1	1	0	1	0	0	0	0	0	1	0	0	1	1	1	0	0	0	0	0	1	9
Tie7922	0	0	1	0	0	1	0	0	0	1	0	0	0	0	0	1	0	0	1	0	0	0	1	6
18-599	1	1	0	1	1	1	1	0	0	1	0	1	0	0	1	1	0	0	1	0	1	0	1	13
SCLM202	1	1	1	0	1	1	0	0	0	1	0	1	0	0	0	1	0	0	1	0	1	0	1	11
48-2	0	1	1	0	1	1	0	1	0	1	0	0	1	1	1	0	1	0	0	0	0	1	1	12
DH40	0	1	0	0	1	1	0	1	0	1	0	1	0	0	0	0	1	1	1	0	0	1	1	11
PH6WC	1	1	0	0	1	1	0	1	0	1	0	1	0	0	1	1	1	0	0	0	1	0	1	12
PH4CV	0	1	1	0	1	1	0	0	0	0	0	1	0	0	1	1	1	0	1	0	0	1	1	11
646	1	0	0	1	0	0	0	1	0	1	1	0	0	1	0	1	0	0	1	0	0	0	1	9
Percentage%	46.6667	60	70	23.3333	56.6667	90	16.6667	36.6667	6.66667	80	3.33333	63.3333	30	16.6667	56.6667	66.6667	56.6667	3.33333	63.3333	3.33333	26.6667	33.3333	90
Note: "1" represents the superior allele and "0" represents inferior the superior allele.

## Sheet: Table S4
Table S4. All the genes within the co-localized regions of llinkage mapping and genome-wide association study
QTL name	Interval (bp)	SNP	Position	Left(-300Kb)	Right(+300Kb)	Chromosome	Gene name（V4 ）	description
qESL-2-1	147600000-165050000	PZE-102119965	163454655	163154655	163754655	2	Zm00001d005293	cyclin11
						2	Zm00001d005298	receptor-like kinase
						2	Zm00001d005295	DNA-directed RNA polymerases II IV and V subunit 3
						2	Zm00001d005297	Protein longifol2
qESL-2-2	207075000-209200000	PZE-102161136	207151147	206851147	207151147	2	Zm00001d006678	geranylgeranyl pyrophosphate synthase1
						2	Zm00001d006677	Protein brassinazole-resistant1
						2	Zm00001d006681	Unknown
						2	Zm00001d006679	UDP-galactose transporter 2
						2	Zm00001d006680	P-loop containing nucleoside triphosphate hydrolases superfamily protein
						2	Zm00001d006682	Protein indeterminate-domain 11
						2	Zm00001d006683	UDP-glycosyltransferase 78D2
						2	Zm00001d006684	Transferase 252C transferring glycosyl groups
						2	Zm00001d006672	P-loop containing nucleoside triphosphate hydrolases superfamily protein
						2	Zm00001d006676	5-formyltetrahydrofolate cyclo-ligase mitochondrial
qESL-4-1	39625000-127925000	PZE-104052398	83198475	82898475	83498475	4	Zm00001d050406	Probable mannan synthase 7
						4	Zm00001d050403	Chlorophyll a-b binding protein 4
						4	Zm00001d050404	G2-like transcription factor
						4	Zm00001d050401	Polypyrimidine tract-binding protein homolog 1
						4	Zm00001d026305	Nuclear transcription factor Y subunit A-8
qESL-10-1	141100000-142600000	PZB02554.2	142190907	141890907	142490907	10	Zm00001d026286	ribosomal protein S11
						10	Zm00001d026287	UDP-N-acetylglucosamine diphosphorylase 2
						10	Zm00001d026285	OSJNBa0070C17.17 protein 3B protein
						10	Zm00001d026290	NAD(P)-binding Rossmann-fold superfamily protein
						10	Zm00001d026291	DNA methyl transferase2
						10	Zm00001d026284	Vacuolar ATPase assembly integral membrane protein VMA21-like domain
						10	Zm00001d026283	coatomer protein2
						10	Zm00001d026282	36.4 kDa proline-rich protein
						10	Zm00001d026281	Carbohydrate-binding X8 domain superfamily protein
						10	Zm00001d026280	nucleotide binding 3Bnucleic acid binding 3BRNA binding
						10	Zm00001d026278	Whole genome shotgun sequence of line PN40024 scaffold_11.assembly12x (Fragment)
						10	Zm00001d026277	coproporphyrinogen III oxidase2
						10	Zm00001d026296	Trypsin family protein
						10	Zm00001d026293	Gamma-aminobutyrate transaminase POP2 mitochondrial
						10	Zm00001d026295	Unknown
						10	Zm00001d026288	methyl binding domain123
						10	Zm00001d026303	Putative leucine-rich repeat receptor-like protein kinase family protein
						10	Zm00001d026306	Putative leucine-rich repeat receptor-like protein kinase family protein
						10	Zm00001d026289	Potassium transporter 10
						10	Zm00001d026302	OSJNBa0008M17.14 protein 3B protein
						10	Zm00001d026297	Proline-rich family protein
						10	Zm00001d026298	Putative heavy metal transport/detoxification superfamily protein
						10	Zm00001d026300	argonaute2b
Note: QTL represents quantitative trait locus; SNP denotes single nucleotide polymorphism.

## Sheet: Table S5
Table S5: Kyoto Encyclopedia of Genes and Genomes (KEGG) enrichment analysis results of 42 genes
KEGG_A_class	KEGG_B_class	Pathway	P-value	Pathway ID	Genes
Metabolism	Biosynthesis of other secondary metabolites	Flavone and flavonol biosynthesis	0.00960095	ko00944	Zm00001d006683
Metabolism	Metabolism of cofactors and vitamins	One carbon pool by folate	0.0409864	ko00670	Zm00001d006676
Metabolism	Energy metabolism	Photosynthesis - antenna proteins	0.0517502	ko00196	Zm00001d050403
Metabolism	Carbohydrate metabolism	Butanoate metabolism	0.0759312	ko00650	Zm00001d026293
Metabolism	Metabolism of cofactors and vitamins	Plant hormone signal transduction	0.153755	ko04075	Zm00001d005293;Zm00001d006677
Metabolism	Metabolism of terpenoids and polyketides	Porphyrin metabolism	0.125418	ko00860	Zm00001d026277
Genetic Information Processing	Transcription	Terpenoid backbone biosynthesis	0.136696	ko00900	Zm00001d006678
Genetic Information Processing	Translation	RNA polymerase	0.146454	ko03020	Zm00001d005295
Environmental Information Processing	Signal transduction	Aminoacyl-tRNA biosynthesis	0.151983	ko00970	Zm00001d026305
Metabolism	Amino acid metabolism	Alanine, aspartate and glutamate metabolism	0.171073	ko00250	Zm00001d026293
Cellular Processes	Transport and catabolism	Peroxisome	0.224699	ko04146	Zm00001d026290
Metabolism	Amino acid metabolism	Cysteine and methionine metabolism	0.276263	ko00270	Zm00001d026291
Metabolism	Carbohydrate metabolism	Amino sugar and nucleotide sugar metabolism	0.319018	ko00520	Zm00001d026287
Genetic Information Processing	Folding, sorting and degradation	Ubiquitin mediated proteolysis	0.358344	ko04120	Zm00001d026281
Metabolism	Global and overview maps	Metabolic pathways	0.412594	ko01100	Zm00001d006676;Zm00001d006678;Zm00001d006683;Zm00001d026277;Zm00001d026287;Zm00001d026291;Zm00001d026293;Zm00001d050403
Genetic Information Processing	Transcription	Spliceosome	0.426909	ko03040	Zm00001d026281
Genetic Information Processing	Translation	Ribosome	0.650122	ko03010	Zm00001d026286
Metabolism	Global and overview maps	Biosynthesis of secondary metabolites	0.787366	ko01110	Zm00001d006678;Zm00001d006683;Zm00001d026277

## Sheet: Table S6
Table S6. Expressions of 42 candidate genes in four developmental periods
Gene	L1	L2	L3	L4
Zm00001d026289	52.9	73.575	76.565	80.36
Zm00001d026302	18.22	19.08	21.35	24.245
Zm00001d026305	43.22	48.44	52.265	68.24
Zm00001d026288	44.01	46.505	74.85	94.95
Zm00001d006678	16.245	26.865	27.18	34.475
Zm00001d026278	102.635	180.45	165.05	238.455
Zm00001d026277	3.76	4.405	5.675	7.8
Zm00001d006677	47.265	86.175	89.155	44.075
Zm00001d006681	50.575	51.345	53.065	35.66
Zm00001d006680	35.68	47.89	50.9	40.57
Zm00001d026286	72.57	79.6	77.02	31.44
Zm00001d026287	180.12	89.235	120.62	252.545
Zm00001d006682	39.5	37.28	34.465	53.47
Zm00001d006683	12.685	6.775	8.785	19.945
Zm00001d006684	4.775	1.195	0.98	1.3
Zm00001d026285	6.065	5.695	6.37	10.055
Zm00001d026290	7.155	9.405	12.32	9.31
Zm00001d026291	39.79	62.705	64.73	45.41
Zm00001d026284	12.36	13.145	11.09	11.795
Zm00001d026282	44.88	12.545	7.1	52.74
Zm00001d026281	0.405	4.395	3.81	0.001
Zm00001d026280	17.505	15.54	13.88	17.2
Zm00001d026296	41.205	51.895	66.47	45.905
Zm00001d005297	14.965	19.165	18.225	8.16
Zm00001d050406	35.22	59.445	86.295	2.975
Zm00001d026293	37.065	64.035	71.625	33.33
Zm00001d026295	17.98	26.19	35.55	24.295
Zm00001d006672	1.455	2.375	2.1	1.055
Zm00001d026303	29.425	21	27.345	67.375
Zm00001d026306	8.65	5.325	8.36	30.965
Zm00001d050403	22.505	57.695	92.23	63.06
Zm00001d005293	2.405	7.395	7.495	0.53
Zm00001d050401	40.96	42.585	49.885	40.265
Zm00001d026297	0.395	0.001	0.095	0.315
Zm00001d026298	3.27	0.77	0.875	3.135
Zm00001d026300	7.055	3.91	3.52	5.775
Zm00001d006676	39.96	40.76	35.22	28.555
Zm00001d005295	34.795	41.585	35.835	38.32
Zm00001d005298	7.225	6.535	4.19	0.001
Zm00001d050404	96.31	76.525	58.39	23.19
Zm00001d006679	79.48	76.145	66.53	16.595
Zm00001d026283	252.805	204.82	191.615	82.29
Note: L1-L4 represent the different lengths of the second internode of ear shanks, L1:1.01 ± 0.02 cm; L2:1.98 ± 0.03; L3:3.02 ± 0.04 cm; L4: 3.98 ± 0.03 cm, respectively. The genes in bold show the candidate genes for ear shank length.

## Sheet: Table S7
Table S7. Annotations of all the SNPs identified in each candidate gene.
Gene name	Chromosome	Physical Position	Marker	Variant	ALT	Variation type	Annotations
Zm00001d005293	2	168003872	S_2_168003872	T/C	C	SNP	CSQ=C|upstream_gene_variant|MODIFIER||Zm00001d005293|Transcript|Zm00001d005293_T001|protein_coding|||||||||||1966|1||||data.gff.gz|
	2	168003887	S_2_168003887	C	T	SNP	CSQ=T|upstream_gene_variant|MODIFIER||Zm00001d005293|Transcript|Zm00001d005293_T001|protein_coding|||||||||||1951|1||||data.gff.gz|
	2	168004001	S_2_168004001	G	A	SNP	CSQ=A|upstream_gene_variant|MODIFIER||Zm00001d005293|Transcript|Zm00001d005293_T001|protein_coding|||||||||||1837|1||||data.gff.gz|
	2	168004182	S_2_168004182	T	G	SNP	CSQ=G|upstream_gene_variant|MODIFIER||Zm00001d005293|Transcript|Zm00001d005293_T001|protein_coding|||||||||||1656|1||||data.gff.gz|
	2	168004668	S_2_168004668	ATTGATGAG	A	InDel	CSQ=-|upstream_gene_variant|MODIFIER||Zm00001d005293|Transcript|Zm00001d005293_T001|protein_coding|||||||||||1162|1||||data.gff.gz|
	2	168004724	S_2_168004724	G	A		CSQ=A|upstream_gene_variant|MODIFIER||Zm00001d005293|Transcript|Zm00001d005293_T001|protein_coding|||||||||||1114|1||||data.gff.gz|
	2	168004775	S_2_168004775	G	A		CSQ=A|upstream_gene_variant|MODIFIER||Zm00001d005293|Transcript|Zm00001d005293_T001|protein_coding|||||||||||1063|1||||data.gff.gz|
	2	168004893	S_2_168004893	G	A		CSQ=A|upstream_gene_variant|MODIFIER||Zm00001d005293|Transcript|Zm00001d005293_T001|protein_coding|||||||||||945|1||||data.gff.gz|
	2	168004905	S_2_168004905	C	T		CSQ=T|upstream_gene_variant|MODIFIER||Zm00001d005293|Transcript|Zm00001d005293_T001|protein_coding|||||||||||933|1||||data.gff.gz|
	2	168005025	S_2_168005025	A	G		CSQ=G|upstream_gene_variant|MODIFIER||Zm00001d005293|Transcript|Zm00001d005293_T001|protein_coding|||||||||||813|1||||data.gff.gz|
	2	168005041	S_2_168005041	C	T		CSQ=T|upstream_gene_variant|MODIFIER||Zm00001d005293|Transcript|Zm00001d005293_T001|protein_coding|||||||||||797|1||||data.gff.gz|
	2	168005066	S_2_168005066	A	G		CSQ=G|upstream_gene_variant|MODIFIER||Zm00001d005293|Transcript|Zm00001d005293_T001|protein_coding|||||||||||772|1||||data.gff.gz|
	2	168005154	S_2_168005154	A	G		CSQ=G|upstream_gene_variant|MODIFIER||Zm00001d005293|Transcript|Zm00001d005293_T001|protein_coding|||||||||||684|1||||data.gff.gz|
	2	168005373	S_2_168005373	G	A		CSQ=A|upstream_gene_variant|MODIFIER||Zm00001d005293|Transcript|Zm00001d005293_T001|protein_coding|||||||||||465|1||||data.gff.gz|
	2	168005388	S_2_168005388	C	T		CSQ=T|upstream_gene_variant|MODIFIER||Zm00001d005293|Transcript|Zm00001d005293_T001|protein_coding|||||||||||450|1||||data.gff.gz|
	2	168005471	S_2_168005471	G	A		CSQ=A|upstream_gene_variant|MODIFIER||Zm00001d005293|Transcript|Zm00001d005293_T001|protein_coding|||||||||||367|1||||data.gff.gz|
	2	168005846	S_2_168005846	C	G		CSQ=G|5_prime_UTR_variant|MODIFIER||Zm00001d005293|Transcript|Zm00001d005293_T001|protein_coding|1/3||||9|||||||1||||data.gff.gz|
	2	168006316	S_2_168006316	G	A		CSQ=A|synonymous_variant|LOW||Zm00001d005293|Transcript|Zm00001d005293_T001|protein_coding|1/3||||479|153|51|A|gcG/gcA|||1||||data.gff.gz|
	2	168006585	S_2_168006585	G	T		CSQ=T|missense_variant|MODERATE||Zm00001d005293|Transcript|Zm00001d005293_T001|protein_coding|1/3||||748|422|141|R/L|cGc/cTc|||1||||data.gff.gz|
	2	168006823	S_2_168006823	T	C		CSQ=C|intron_variant|MODIFIER||Zm00001d005293|Transcript|Zm00001d005293_T001|protein_coding||1/2||||||||||1||||data.gff.gz|
	2	168007596	S_2_168007596	A	T		CSQ=T|3_prime_UTR_variant|MODIFIER||Zm00001d005293|Transcript|Zm00001d005293_T001|protein_coding|3/3||||1566|||||||1||||data.gff.gz|
	2	168007882	S_2_168007882	C	G		CSQ=G|3_prime_UTR_variant|MODIFIER||Zm00001d005293|Transcript|Zm00001d005293_T001|protein_coding|3/3||||1852|||||||1||||data.gff.gz|
Zm00001d026282	10	142757685	S_10_142757685	T	G		CSQ=G|upstream_gene_variant|MODIFIER||Zm00001d026281|Transcript|Zm00001d026281_T001|protein_coding|||||||||||4042|-1||||data.gff.gz|,G|upstream_gene_variant|MODIFIER||Zm00001d026281|Transcript|Zm00001d026281_T002|protein_coding|||||||||||1604|-1||||data.gff.gz|,G|upstream_gene_variant|MODIFIER||Zm00001d026281|Transcript|Zm00001d026281_T003|protein_coding|||||||||||1604|-1||||data.gff.gz|,G|upstre…
	10	142757934	S_10_142757934	G	T		CSQ=T|upstream_gene_variant|MODIFIER||Zm00001d026281|Transcript|Zm00001d026281_T001|protein_coding|||||||||||4291|-1||||data.gff.gz|,T|upstream_gene_variant|MODIFIER||Zm00001d026281|Transcript|Zm00001d026281_T002|protein_coding|||||||||||1853|-1||||data.gff.gz|,T|upstream_gene_variant|MODIFIER||Zm00001d026281|Transcript|Zm00001d026281_T003|protein_coding|||||||||||1853|-1||||data.gff.gz|,T|upstre…
	10	142758265	S_10_142758265	C	T		CSQ=T|upstream_gene_variant|MODIFIER||Zm00001d026281|Transcript|Zm00001d026281_T001|protein_coding|||||||||||4622|-1||||data.gff.gz|,T|upstream_gene_variant|MODIFIER||Zm00001d026281|Transcript|Zm00001d026281_T002|protein_coding|||||||||||2184|-1||||data.gff.gz|,T|upstream_gene_variant|MODIFIER||Zm00001d026281|Transcript|Zm00001d026281_T003|protein_coding|||||||||||2184|-1||||data.gff.gz|,T|upstre…
	10	142758342	S_10_142758342	T	C		CSQ=C|upstream_gene_variant|MODIFIER||Zm00001d026281|Transcript|Zm00001d026281_T001|protein_coding|||||||||||4699|-1||||data.gff.gz|,C|upstream_gene_variant|MODIFIER||Zm00001d026281|Transcript|Zm00001d026281_T002|protein_coding|||||||||||2261|-1||||data.gff.gz|,C|upstream_gene_variant|MODIFIER||Zm00001d026281|Transcript|Zm00001d026281_T003|protein_coding|||||||||||2261|-1||||data.gff.gz|,C|upstre…
	10	142758412	S_10_142758412	C	T		CSQ=T|upstream_gene_variant|MODIFIER||Zm00001d026281|Transcript|Zm00001d026281_T001|protein_coding|||||||||||4769|-1||||data.gff.gz|,T|upstream_gene_variant|MODIFIER||Zm00001d026281|Transcript|Zm00001d026281_T002|protein_coding|||||||||||2331|-1||||data.gff.gz|,T|upstream_gene_variant|MODIFIER||Zm00001d026281|Transcript|Zm00001d026281_T003|protein_coding|||||||||||2331|-1||||data.gff.gz|,T|upstre…
	10	142758460	S_10_142758460	T	C		CSQ=C|upstream_gene_variant|MODIFIER||Zm00001d026281|Transcript|Zm00001d026281_T001|protein_coding|||||||||||4817|-1||||data.gff.gz|,C|upstream_gene_variant|MODIFIER||Zm00001d026281|Transcript|Zm00001d026281_T002|protein_coding|||||||||||2379|-1||||data.gff.gz|,C|upstream_gene_variant|MODIFIER||Zm00001d026281|Transcript|Zm00001d026281_T003|protein_coding|||||||||||2379|-1||||data.gff.gz|,C|upstre…
	10	142758668	S_10_142758668	A	G		CSQ=G|upstream_gene_variant|MODIFIER||Zm00001d026281|Transcript|Zm00001d026281_T002|protein_coding|||||||||||2587|-1||||data.gff.gz|,G|upstream_gene_variant|MODIFIER||Zm00001d026281|Transcript|Zm00001d026281_T003|protein_coding|||||||||||2587|-1||||data.gff.gz|,G|upstream_gene_variant|MODIFIER||Zm00001d026281|Transcript|Zm00001d026281_T004|protein_coding|||||||||||2788|-1||||data.gff.gz|,G|upstre…
	10	142758905	S_10_142758905	C	T		CSQ=T|upstream_gene_variant|MODIFIER||Zm00001d026281|Transcript|Zm00001d026281_T002|protein_coding|||||||||||2824|-1||||data.gff.gz|,T|upstream_gene_variant|MODIFIER||Zm00001d026281|Transcript|Zm00001d026281_T003|protein_coding|||||||||||2824|-1||||data.gff.gz|,T|upstream_gene_variant|MODIFIER||Zm00001d026281|Transcript|Zm00001d026281_T004|protein_coding|||||||||||3025|-1||||data.gff.gz|,T|upstre…
	10	142759033	S_10_142759033	A	G		CSQ=G|upstream_gene_variant|MODIFIER||Zm00001d026281|Transcript|Zm00001d026281_T002|protein_coding|||||||||||2952|-1||||data.gff.gz|,G|upstream_gene_variant|MODIFIER||Zm00001d026281|Transcript|Zm00001d026281_T003|protein_coding|||||||||||2952|-1||||data.gff.gz|,G|upstream_gene_variant|MODIFIER||Zm00001d026281|Transcript|Zm00001d026281_T004|protein_coding|||||||||||3153|-1||||data.gff.gz|,G|upstre…
	10	142759056	S_10_142759056	G	A		CSQ=A|upstream_gene_variant|MODIFIER||Zm00001d026281|Transcript|Zm00001d026281_T002|protein_coding|||||||||||2975|-1||||data.gff.gz|,A|upstream_gene_variant|MODIFIER||Zm00001d026281|Transcript|Zm00001d026281_T003|protein_coding|||||||||||2975|-1||||data.gff.gz|,A|upstream_gene_variant|MODIFIER||Zm00001d026281|Transcript|Zm00001d026281_T004|protein_coding|||||||||||3176|-1||||data.gff.gz|,A|upstre…
	10	142759262	S_10_142759262	C	CCATGGA		CSQ=CATGGA|upstream_gene_variant|MODIFIER||Zm00001d026281|Transcript|Zm00001d026281_T002|protein_coding|||||||||||3181|-1||||data.gff.gz|,CATGGA|upstream_gene_variant|MODIFIER||Zm00001d026281|Transcript|Zm00001d026281_T003|protein_coding|||||||||||3181|-1||||data.gff.gz|,CATGGA|upstream_gene_variant|MODIFIER||Zm00001d026281|Transcript|Zm00001d026281_T004|protein_coding|||||||||||3382|-1||||data.g…
	10	142759428	S_10_142759428	G	A		CSQ=A|upstream_gene_variant|MODIFIER||Zm00001d026281|Transcript|Zm00001d026281_T002|protein_coding|||||||||||3347|-1||||data.gff.gz|,A|upstream_gene_variant|MODIFIER||Zm00001d026281|Transcript|Zm00001d026281_T003|protein_coding|||||||||||3347|-1||||data.gff.gz|,A|upstream_gene_variant|MODIFIER||Zm00001d026281|Transcript|Zm00001d026281_T004|protein_coding|||||||||||3548|-1||||data.gff.gz|,A|upstre…
	10	142759866	S_10_142759866	C	A		CSQ=A|upstream_gene_variant|MODIFIER||Zm00001d026281|Transcript|Zm00001d026281_T002|protein_coding|||||||||||3785|-1||||data.gff.gz|,A|upstream_gene_variant|MODIFIER||Zm00001d026281|Transcript|Zm00001d026281_T003|protein_coding|||||||||||3785|-1||||data.gff.gz|,A|upstream_gene_variant|MODIFIER||Zm00001d026281|Transcript|Zm00001d026281_T004|protein_coding|||||||||||3986|-1||||data.gff.gz|,A|upstre…
Zm00001d005298	2	168385400	S_2_168385400	G	A		CSQ=A|upstream_gene_variant|MODIFIER||Zm00001d005298|Transcript|Zm00001d005298_T001|protein_coding|||||||||||830|1||||data.gff.gz|
	2	168385904	S_2_168385904	G	A		CSQ=A|upstream_gene_variant|MODIFIER||Zm00001d005298|Transcript|Zm00001d005298_T001|protein_coding|||||||||||326|1||||data.gff.gz|
	2	168386092	S_2_168386092	C	T		CSQ=T|upstream_gene_variant|MODIFIER||Zm00001d005298|Transcript|Zm00001d005298_T001|protein_coding|||||||||||138|1||||data.gff.gz|
	2	168386187	S_2_168386187	AATCAGT	A		CSQ=-|upstream_gene_variant|MODIFIER||Zm00001d005298|Transcript|Zm00001d005298_T001|protein_coding|||||||||||37|1||||data.gff.gz|
	2	168386293	S_2_168386293	T	C		CSQ=C|5_prime_UTR_variant|MODIFIER||Zm00001d005298|Transcript|Zm00001d005298_T001|protein_coding|1/2||||64|||||||1||||data.gff.gz|
	2	168386498	S_2_168386498	A	G		CSQ=G|missense_variant|MODERATE||Zm00001d005298|Transcript|Zm00001d005298_T001|protein_coding|1/2||||269|85|29|T/A|Acc/Gcc|||1||||data.gff.gz|
	2	168386502	S_2_168386502	G	C		CSQ=C|missense_variant|MODERATE||Zm00001d005298|Transcript|Zm00001d005298_T001|protein_coding|1/2||||273|89|30|S/T|aGt/aCt|||1||||data.gff.gz|
	2	168386542	S_2_168386542	A	G		CSQ=G|synonymous_variant|LOW||Zm00001d005298|Transcript|Zm00001d005298_T001|protein_coding|1/2||||313|129|43|L|ctA/ctG|||1||||data.gff.gz|
	2	168386553	S_2_168386553	G	C		CSQ=C|missense_variant|MODERATE||Zm00001d005298|Transcript|Zm00001d005298_T001|protein_coding|1/2||||324|140|47|C/S|tGc/tCc|||1||||data.gff.gz|
	2	168386658	S_2_168386658	T	C		CSQ=C|missense_variant|MODERATE||Zm00001d005298|Transcript|Zm00001d005298_T001|protein_coding|1/2||||429|245|82|V/A|gTc/gCc|||1||||data.gff.gz|
	2	168386811	S_2_168386811	C	G		CSQ=G|missense_variant|MODERATE||Zm00001d005298|Transcript|Zm00001d005298_T001|protein_coding|1/2||||582|398|133|T/S|aCc/aGc|||1||||data.gff.gz|
	2	168386826	S_2_168386826	C	T		CSQ=T|missense_variant|MODERATE||Zm00001d005298|Transcript|Zm00001d005298_T001|protein_coding|1/2||||597|413|138|P/L|cCc/cTc|||1||||data.gff.gz|
	2	168386960	S_2_168386960	G	C		CSQ=C|missense_variant|MODERATE||Zm00001d005298|Transcript|Zm00001d005298_T001|protein_coding|1/2||||731|547|183|A/P|Gcc/Ccc|||1||||data.gff.gz|
	2	168386961	S_2_168386961	C	T		CSQ=T|missense_variant|MODERATE||Zm00001d005298|Transcript|Zm00001d005298_T001|protein_coding|1/2||||732|548|183|A/V|gCc/gTc|||1||||data.gff.gz|
	2	168387041	S_2_168387041	C	A		CSQ=A|missense_variant|MODERATE||Zm00001d005298|Transcript|Zm00001d005298_T001|protein_coding|1/2||||812|628|210|R/S|Cgc/Agc|||1||||data.gff.gz|
	2	168387181	S_2_168387181	C	G		CSQ=G|missense_variant|MODERATE||Zm00001d005298|Transcript|Zm00001d005298_T001|protein_coding|1/2||||952|768|256|D/E|gaC/gaG|||1||||data.gff.gz|
	2	168387243	S_2_168387243	C	T		CSQ=T|missense_variant|MODERATE||Zm00001d005298|Transcript|Zm00001d005298_T001|protein_coding|1/2||||1014|830|277|A/V|gCc/gTc|||1||||data.gff.gz|
	2	168387304	S_2_168387304	G	C		CSQ=C|missense_variant|MODERATE||Zm00001d005298|Transcript|Zm00001d005298_T001|protein_coding|1/2||||1075|891|297|E/D|gaG/gaC|||1||||data.gff.gz|
	2	168387397	S_2_168387397	G	A		CSQ=A|synonymous_variant|LOW||Zm00001d005298|Transcript|Zm00001d005298_T001|protein_coding|1/2||||1168|984|328|S|tcG/tcA|||1||||data.gff.gz|
	2	168387479	S_2_168387479	G	A		CSQ=A|missense_variant|MODERATE||Zm00001d005298|Transcript|Zm00001d005298_T001|protein_coding|1/2||||1250|1066|356|A/T|Gcg/Acg|||1||||data.gff.gz|
	2	168387712	S_2_168387712	C	G		CSQ=G|synonymous_variant|LOW||Zm00001d005298|Transcript|Zm00001d005298_T001|protein_coding|1/2||||1483|1299|433|R|cgC/cgG|||1||||data.gff.gz|
	2	168387764	S_2_168387764	C	T		CSQ=T|missense_variant|MODERATE||Zm00001d005298|Transcript|Zm00001d005298_T001|protein_coding|1/2||||1535|1351|451|P/S|Ccg/Tcg|||1||||data.gff.gz|
	2	168387910	S_2_168387910	G	T		CSQ=T|synonymous_variant|LOW||Zm00001d005298|Transcript|Zm00001d005298_T001|protein_coding|1/2||||1681|1497|499|A|gcG/gcT|||1||||data.gff.gz|
	2	168387979	S_2_168387979	G	T		CSQ=T|synonymous_variant|LOW||Zm00001d005298|Transcript|Zm00001d005298_T001|protein_coding|1/2||||1750|1566|522|A|gcG/gcT|||1||||data.gff.gz|
	2	168388027	S_2_168388027	G	A		CSQ=A|synonymous_variant|LOW||Zm00001d005298|Transcript|Zm00001d005298_T001|protein_coding|1/2||||1798|1614|538|E|gaG/gaA|||1||||data.gff.gz|
	2	168388102	S_2_168388102	C	T		CSQ=T|synonymous_variant|LOW||Zm00001d005298|Transcript|Zm00001d005298_T001|protein_coding|1/2||||1873|1689|563|G|ggC/ggT|||1||||data.gff.gz|
	2	168388158	S_2_168388158	A	T		CSQ=T|missense_variant|MODERATE||Zm00001d005298|Transcript|Zm00001d005298_T001|protein_coding|1/2||||1929|1745|582|H/L|cAc/cTc|||1||||data.gff.gz|
	2	168388238	S_2_168388238	A	T		CSQ=T|intron_variant|MODIFIER||Zm00001d005298|Transcript|Zm00001d005298_T001|protein_coding||1/1||||||||||1||||data.gff.gz|
	2	168388459	S_2_168388459	G	A		CSQ=A|missense_variant|MODERATE||Zm00001d005298|Transcript|Zm00001d005298_T001|protein_coding|2/2||||2147|1963|655|G/R|Ggg/Agg|||1||||data.gff.gz|
	2	168388533	S_2_168388533	C	T		CSQ=T|synonymous_variant|LOW||Zm00001d005298|Transcript|Zm00001d005298_T001|protein_coding|2/2||||2221|2037|679|P|ccC/ccT|||1||||data.gff.gz|
	2	168388692	S_2_168388692	G	A		CSQ=A|synonymous_variant|LOW||Zm00001d005298|Transcript|Zm00001d005298_T001|protein_coding|2/2||||2380|2196|732|E|gaG/gaA|||1||||data.gff.gz|
	2	168388711	S_2_168388711	C	A		CSQ=A|missense_variant|MODERATE||Zm00001d005298|Transcript|Zm00001d005298_T001|protein_coding|2/2||||2399|2215|739|L/M|Ctg/Atg|||1||||data.gff.gz|
	2	168388938	S_2_168388938	T	C		CSQ=C|synonymous_variant|LOW||Zm00001d005298|Transcript|Zm00001d005298_T001|protein_coding|2/2||||2626|2442|814|A|gcT/gcC|||1||||data.gff.gz|
Zm00001d026306	10	143271453	S_10_143271453	T	C		CSQ=C|intron_variant|MODIFIER||Zm00001d026305|Transcript|Zm00001d026305_T001|protein_coding||14/14||||||||||1||||data.gff.gz|,C|intron_variant|MODIFIER||Zm00001d026305|Transcript|Zm00001d026305_T002|protein_coding||14/14||||||||||1||||data.gff.gz|,C|intron_variant|MODIFIER||Zm00001d026305|Transcript|Zm00001d026305_T003|protein_coding||13/13||||||||||1||||data.gff.gz|,C|3_prime_UTR_variant|MODIFIE…
	10	143271606	S_10_143271606	C	A		CSQ=A|intron_variant|MODIFIER||Zm00001d026305|Transcript|Zm00001d026305_T001|protein_coding||14/14||||||||||1||||data.gff.gz|,A|intron_variant|MODIFIER||Zm00001d026305|Transcript|Zm00001d026305_T002|protein_coding||14/14||||||||||1||||data.gff.gz|,A|intron_variant|MODIFIER||Zm00001d026305|Transcript|Zm00001d026305_T003|protein_coding||13/13||||||||||1||||data.gff.gz|,A|3_prime_UTR_variant|MODIFIE…
	10	143271614	S_10_143271614	A	C		CSQ=C|intron_variant|MODIFIER||Zm00001d026305|Transcript|Zm00001d026305_T001|protein_coding||14/14||||||||||1||||data.gff.gz|,C|intron_variant|MODIFIER||Zm00001d026305|Transcript|Zm00001d026305_T002|protein_coding||14/14||||||||||1||||data.gff.gz|,C|intron_variant|MODIFIER||Zm00001d026305|Transcript|Zm00001d026305_T003|protein_coding||13/13||||||||||1||||data.gff.gz|,C|3_prime_UTR_variant|MODIFIE…
	10	143271703	S_10_143271703	G	C		CSQ=C|3_prime_UTR_variant|MODIFIER||Zm00001d026305|Transcript|Zm00001d026305_T001|protein_coding|15/15||||2288|||||||1||||data.gff.gz|,C|3_prime_UTR_variant|MODIFIER||Zm00001d026305|Transcript|Zm00001d026305_T002|protein_coding|15/15||||2336|||||||1||||data.gff.gz|,C|3_prime_UTR_variant|MODIFIER||Zm00001d026305|Transcript|Zm00001d026305_T003|protein_coding|14/14||||2964|||||||1||||data.gff.gz|,C|…
	10	143271791	S_10_143271791	G	A		CSQ=A|3_prime_UTR_variant|MODIFIER||Zm00001d026305|Transcript|Zm00001d026305_T001|protein_coding|15/15||||2376|||||||1||||data.gff.gz|,A|3_prime_UTR_variant|MODIFIER||Zm00001d026305|Transcript|Zm00001d026305_T002|protein_coding|15/15||||2424|||||||1||||data.gff.gz|,A|3_prime_UTR_variant|MODIFIER||Zm00001d026305|Transcript|Zm00001d026305_T003|protein_coding|14/14||||3052|||||||1||||data.gff.gz|,A|…
	10	143271828	S_10_143271828	T	G		CSQ=G|3_prime_UTR_variant|MODIFIER||Zm00001d026305|Transcript|Zm00001d026305_T001|protein_coding|15/15||||2413|||||||1||||data.gff.gz|,G|3_prime_UTR_variant|MODIFIER||Zm00001d026305|Transcript|Zm00001d026305_T002|protein_coding|15/15||||2461|||||||1||||data.gff.gz|,G|3_prime_UTR_variant|MODIFIER||Zm00001d026305|Transcript|Zm00001d026305_T003|protein_coding|14/14||||3089|||||||1||||data.gff.gz|,G|…
	10	143271875	S_10_143271875	C	T		CSQ=T|3_prime_UTR_variant|MODIFIER||Zm00001d026305|Transcript|Zm00001d026305_T001|protein_coding|15/15||||2460|||||||1||||data.gff.gz|,T|3_prime_UTR_variant|MODIFIER||Zm00001d026305|Transcript|Zm00001d026305_T002|protein_coding|15/15||||2508|||||||1||||data.gff.gz|,T|3_prime_UTR_variant|MODIFIER||Zm00001d026305|Transcript|Zm00001d026305_T003|protein_coding|14/14||||3136|||||||1||||data.gff.gz|,T|…
	10	143272499	S_10_143272499	G	A		CSQ=A|downstream_gene_variant|MODIFIER||Zm00001d026305|Transcript|Zm00001d026305_T001|protein_coding|||||||||||213|1||||data.gff.gz|,A|downstream_gene_variant|MODIFIER||Zm00001d026305|Transcript|Zm00001d026305_T002|protein_coding|||||||||||213|1||||data.gff.gz|,A|downstream_gene_variant|MODIFIER||Zm00001d026305|Transcript|Zm00001d026305_T003|protein_coding|||||||||||213|1||||data.gff.gz|,A|downst…
	10	143272565	S_10_143272565	C	T		CSQ=T|downstream_gene_variant|MODIFIER||Zm00001d026305|Transcript|Zm00001d026305_T001|protein_coding|||||||||||279|1||||data.gff.gz|,T|downstream_gene_variant|MODIFIER||Zm00001d026305|Transcript|Zm00001d026305_T002|protein_coding|||||||||||279|1||||data.gff.gz|,T|downstream_gene_variant|MODIFIER||Zm00001d026305|Transcript|Zm00001d026305_T003|protein_coding|||||||||||279|1||||data.gff.gz|,T|downst…
	10	143272625	S_10_143272625	T	C		CSQ=C|downstream_gene_variant|MODIFIER||Zm00001d026305|Transcript|Zm00001d026305_T001|protein_coding|||||||||||339|1||||data.gff.gz|,C|downstream_gene_variant|MODIFIER||Zm00001d026305|Transcript|Zm00001d026305_T002|protein_coding|||||||||||339|1||||data.gff.gz|,C|downstream_gene_variant|MODIFIER||Zm00001d026305|Transcript|Zm00001d026305_T003|protein_coding|||||||||||339|1||||data.gff.gz|,C|downst…
	10	143272643	S_10_143272643	C	T		CSQ=T|downstream_gene_variant|MODIFIER||Zm00001d026305|Transcript|Zm00001d026305_T001|protein_coding|||||||||||357|1||||data.gff.gz|,T|downstream_gene_variant|MODIFIER||Zm00001d026305|Transcript|Zm00001d026305_T002|protein_coding|||||||||||357|1||||data.gff.gz|,T|downstream_gene_variant|MODIFIER||Zm00001d026305|Transcript|Zm00001d026305_T003|protein_coding|||||||||||357|1||||data.gff.gz|,T|downst…
	10	143272686	S_10_143272686	T	TG		CSQ=G|downstream_gene_variant|MODIFIER||Zm00001d026305|Transcript|Zm00001d026305_T001|protein_coding|||||||||||400|1||||data.gff.gz|,G|downstream_gene_variant|MODIFIER||Zm00001d026305|Transcript|Zm00001d026305_T002|protein_coding|||||||||||400|1||||data.gff.gz|,G|downstream_gene_variant|MODIFIER||Zm00001d026305|Transcript|Zm00001d026305_T003|protein_coding|||||||||||400|1||||data.gff.gz|,G|downst…
	10	143272715	S_10_143272715	C	T		CSQ=T|downstream_gene_variant|MODIFIER||Zm00001d026305|Transcript|Zm00001d026305_T001|protein_coding|||||||||||429|1||||data.gff.gz|,T|downstream_gene_variant|MODIFIER||Zm00001d026305|Transcript|Zm00001d026305_T002|protein_coding|||||||||||429|1||||data.gff.gz|,T|downstream_gene_variant|MODIFIER||Zm00001d026305|Transcript|Zm00001d026305_T003|protein_coding|||||||||||429|1||||data.gff.gz|,T|downst…
	10	143272820	S_10_143272820	C	T		CSQ=T|downstream_gene_variant|MODIFIER||Zm00001d026305|Transcript|Zm00001d026305_T001|protein_coding|||||||||||534|1||||data.gff.gz|,T|downstream_gene_variant|MODIFIER||Zm00001d026305|Transcript|Zm00001d026305_T002|protein_coding|||||||||||534|1||||data.gff.gz|,T|downstream_gene_variant|MODIFIER||Zm00001d026305|Transcript|Zm00001d026305_T003|protein_coding|||||||||||534|1||||data.gff.gz|,T|downst…
	10	143273048	S_10_143273048	C	T		CSQ=T|downstream_gene_variant|MODIFIER||Zm00001d026305|Transcript|Zm00001d026305_T001|protein_coding|||||||||||762|1||||data.gff.gz|,T|downstream_gene_variant|MODIFIER||Zm00001d026305|Transcript|Zm00001d026305_T002|protein_coding|||||||||||762|1||||data.gff.gz|,T|downstream_gene_variant|MODIFIER||Zm00001d026305|Transcript|Zm00001d026305_T003|protein_coding|||||||||||762|1||||data.gff.gz|,T|downst…
	10	143273102	S_10_143273102	A	G		CSQ=G|downstream_gene_variant|MODIFIER||Zm00001d026305|Transcript|Zm00001d026305_T001|protein_coding|||||||||||816|1||||data.gff.gz|,G|downstream_gene_variant|MODIFIER||Zm00001d026305|Transcript|Zm00001d026305_T002|protein_coding|||||||||||816|1||||data.gff.gz|,G|downstream_gene_variant|MODIFIER||Zm00001d026305|Transcript|Zm00001d026305_T003|protein_coding|||||||||||816|1||||data.gff.gz|,G|downst…
	10	143273120	S_10_143273120	A	G		CSQ=G|downstream_gene_variant|MODIFIER||Zm00001d026305|Transcript|Zm00001d026305_T001|protein_coding|||||||||||834|1||||data.gff.gz|,G|downstream_gene_variant|MODIFIER||Zm00001d026305|Transcript|Zm00001d026305_T002|protein_coding|||||||||||834|1||||data.gff.gz|,G|downstream_gene_variant|MODIFIER||Zm00001d026305|Transcript|Zm00001d026305_T003|protein_coding|||||||||||834|1||||data.gff.gz|,G|downst…
	10	143273171	S_10_143273171	T	C		CSQ=C|downstream_gene_variant|MODIFIER||Zm00001d026305|Transcript|Zm00001d026305_T001|protein_coding|||||||||||885|1||||data.gff.gz|,C|downstream_gene_variant|MODIFIER||Zm00001d026305|Transcript|Zm00001d026305_T002|protein_coding|||||||||||885|1||||data.gff.gz|,C|downstream_gene_variant|MODIFIER||Zm00001d026305|Transcript|Zm00001d026305_T003|protein_coding|||||||||||885|1||||data.gff.gz|,C|downst…
	10	143273226	S_10_143273226	G	C		CSQ=C|downstream_gene_variant|MODIFIER||Zm00001d026305|Transcript|Zm00001d026305_T001|protein_coding|||||||||||940|1||||data.gff.gz|,C|downstream_gene_variant|MODIFIER||Zm00001d026305|Transcript|Zm00001d026305_T002|protein_coding|||||||||||940|1||||data.gff.gz|,C|downstream_gene_variant|MODIFIER||Zm00001d026305|Transcript|Zm00001d026305_T003|protein_coding|||||||||||940|1||||data.gff.gz|,C|downst…
	10	143273308	S_10_143273308	C	T		CSQ=T|downstream_gene_variant|MODIFIER||Zm00001d026305|Transcript|Zm00001d026305_T001|protein_coding|||||||||||1022|1||||data.gff.gz|,T|downstream_gene_variant|MODIFIER||Zm00001d026305|Transcript|Zm00001d026305_T002|protein_coding|||||||||||1022|1||||data.gff.gz|,T|downstream_gene_variant|MODIFIER||Zm00001d026305|Transcript|Zm00001d026305_T003|protein_coding|||||||||||1022|1||||data.gff.gz|,T|dow…
	10	143273313	S_10_143273313	A	T		CSQ=T|downstream_gene_variant|MODIFIER||Zm00001d026305|Transcript|Zm00001d026305_T001|protein_coding|||||||||||1027|1||||data.gff.gz|,T|downstream_gene_variant|MODIFIER||Zm00001d026305|Transcript|Zm00001d026305_T002|protein_coding|||||||||||1027|1||||data.gff.gz|,T|downstream_gene_variant|MODIFIER||Zm00001d026305|Transcript|Zm00001d026305_T003|protein_coding|||||||||||1027|1||||data.gff.gz|,T|dow…
	10	143273642	S_10_143273642	G	A		CSQ=A|downstream_gene_variant|MODIFIER||Zm00001d026305|Transcript|Zm00001d026305_T001|protein_coding|||||||||||1356|1||||data.gff.gz|,A|downstream_gene_variant|MODIFIER||Zm00001d026305|Transcript|Zm00001d026305_T002|protein_coding|||||||||||1356|1||||data.gff.gz|,A|downstream_gene_variant|MODIFIER||Zm00001d026305|Transcript|Zm00001d026305_T003|protein_coding|||||||||||1356|1||||data.gff.gz|,A|dow…
	10	143273997	S_10_143273997	A	C		CSQ=C|downstream_gene_variant|MODIFIER||Zm00001d026305|Transcript|Zm00001d026305_T001|protein_coding|||||||||||1711|1||||data.gff.gz|,C|downstream_gene_variant|MODIFIER||Zm00001d026305|Transcript|Zm00001d026305_T002|protein_coding|||||||||||1711|1||||data.gff.gz|,C|downstream_gene_variant|MODIFIER||Zm00001d026305|Transcript|Zm00001d026305_T003|protein_coding|||||||||||1711|1||||data.gff.gz|,C|dow…
	10	143274327	S_10_143274327	A	G		CSQ=G|downstream_gene_variant|MODIFIER||Zm00001d026305|Transcript|Zm00001d026305_T001|protein_coding|||||||||||2041|1||||data.gff.gz|,G|downstream_gene_variant|MODIFIER||Zm00001d026305|Transcript|Zm00001d026305_T002|protein_coding|||||||||||2041|1||||data.gff.gz|,G|downstream_gene_variant|MODIFIER||Zm00001d026305|Transcript|Zm00001d026305_T003|protein_coding|||||||||||2041|1||||data.gff.gz|,G|dow…
	10	143274408	S_10_143274408	G	A		CSQ=A|downstream_gene_variant|MODIFIER||Zm00001d026305|Transcript|Zm00001d026305_T001|protein_coding|||||||||||2122|1||||data.gff.gz|,A|downstream_gene_variant|MODIFIER||Zm00001d026305|Transcript|Zm00001d026305_T002|protein_coding|||||||||||2122|1||||data.gff.gz|,A|downstream_gene_variant|MODIFIER||Zm00001d026305|Transcript|Zm00001d026305_T003|protein_coding|||||||||||2122|1||||data.gff.gz|,A|dow…
	10	143274567	S_10_143274567	T	C		CSQ=C|downstream_gene_variant|MODIFIER||Zm00001d026305|Transcript|Zm00001d026305_T001|protein_coding|||||||||||2281|1||||data.gff.gz|,C|downstream_gene_variant|MODIFIER||Zm00001d026305|Transcript|Zm00001d026305_T002|protein_coding|||||||||||2281|1||||data.gff.gz|,C|downstream_gene_variant|MODIFIER||Zm00001d026305|Transcript|Zm00001d026305_T003|protein_coding|||||||||||2281|1||||data.gff.gz|,C|dow…
	10	143274568	S_10_143274568	T	C		CSQ=C|downstream_gene_variant|MODIFIER||Zm00001d026305|Transcript|Zm00001d026305_T001|protein_coding|||||||||||2282|1||||data.gff.gz|,C|downstream_gene_variant|MODIFIER||Zm00001d026305|Transcript|Zm00001d026305_T002|protein_coding|||||||||||2282|1||||data.gff.gz|,C|downstream_gene_variant|MODIFIER||Zm00001d026305|Transcript|Zm00001d026305_T003|protein_coding|||||||||||2282|1||||data.gff.gz|,C|dow…
	10	143274695	S_10_143274695	G	A		CSQ=A|downstream_gene_variant|MODIFIER||Zm00001d026305|Transcript|Zm00001d026305_T001|protein_coding|||||||||||2409|1||||data.gff.gz|,A|downstream_gene_variant|MODIFIER||Zm00001d026305|Transcript|Zm00001d026305_T002|protein_coding|||||||||||2409|1||||data.gff.gz|,A|downstream_gene_variant|MODIFIER||Zm00001d026305|Transcript|Zm00001d026305_T003|protein_coding|||||||||||2409|1||||data.gff.gz|,A|dow…
	10	143274708	S_10_143274708	T	C		CSQ=C|downstream_gene_variant|MODIFIER||Zm00001d026305|Transcript|Zm00001d026305_T001|protein_coding|||||||||||2422|1||||data.gff.gz|,C|downstream_gene_variant|MODIFIER||Zm00001d026305|Transcript|Zm00001d026305_T002|protein_coding|||||||||||2422|1||||data.gff.gz|,C|downstream_gene_variant|MODIFIER||Zm00001d026305|Transcript|Zm00001d026305_T003|protein_coding|||||||||||2422|1||||data.gff.gz|,C|dow…
	10	143274738	S_10_143274738	A	G		CSQ=G|downstream_gene_variant|MODIFIER||Zm00001d026305|Transcript|Zm00001d026305_T001|protein_coding|||||||||||2452|1||||data.gff.gz|,G|downstream_gene_variant|MODIFIER||Zm00001d026305|Transcript|Zm00001d026305_T002|protein_coding|||||||||||2452|1||||data.gff.gz|,G|downstream_gene_variant|MODIFIER||Zm00001d026305|Transcript|Zm00001d026305_T003|protein_coding|||||||||||2452|1||||data.gff.gz|,G|dow…
	10	143275483	S_10_143275483	C	T		CSQ=T|downstream_gene_variant|MODIFIER||Zm00001d026305|Transcript|Zm00001d026305_T001|protein_coding|||||||||||3197|1||||data.gff.gz|,T|downstream_gene_variant|MODIFIER||Zm00001d026305|Transcript|Zm00001d026305_T002|protein_coding|||||||||||3197|1||||data.gff.gz|,T|downstream_gene_variant|MODIFIER||Zm00001d026305|Transcript|Zm00001d026305_T003|protein_coding|||||||||||3197|1||||data.gff.gz|,T|dow…
	10	143275709	S_10_143275709	A	G		CSQ=G|downstream_gene_variant|MODIFIER||Zm00001d026305|Transcript|Zm00001d026305_T001|protein_coding|||||||||||3423|1||||data.gff.gz|,G|downstream_gene_variant|MODIFIER||Zm00001d026305|Transcript|Zm00001d026305_T002|protein_coding|||||||||||3423|1||||data.gff.gz|,G|downstream_gene_variant|MODIFIER||Zm00001d026305|Transcript|Zm00001d026305_T003|protein_coding|||||||||||3423|1||||data.gff.gz|,G|dow…
	10	143275720	S_10_143275720	A	G		CSQ=G|downstream_gene_variant|MODIFIER||Zm00001d026305|Transcript|Zm00001d026305_T001|protein_coding|||||||||||3434|1||||data.gff.gz|,G|downstream_gene_variant|MODIFIER||Zm00001d026305|Transcript|Zm00001d026305_T002|protein_coding|||||||||||3434|1||||data.gff.gz|,G|downstream_gene_variant|MODIFIER||Zm00001d026305|Transcript|Zm00001d026305_T003|protein_coding|||||||||||3434|1||||data.gff.gz|,G|dow…
	10	143275813	S_10_143275813	C	T		CSQ=T|downstream_gene_variant|MODIFIER||Zm00001d026305|Transcript|Zm00001d026305_T001|protein_coding|||||||||||3527|1||||data.gff.gz|,T|downstream_gene_variant|MODIFIER||Zm00001d026305|Transcript|Zm00001d026305_T002|protein_coding|||||||||||3527|1||||data.gff.gz|,T|downstream_gene_variant|MODIFIER||Zm00001d026305|Transcript|Zm00001d026305_T003|protein_coding|||||||||||3527|1||||data.gff.gz|,T|dow…
	10	143276498	S_10_143276498	T	C		CSQ=C|downstream_gene_variant|MODIFIER||Zm00001d026305|Transcript|Zm00001d026305_T001|protein_coding|||||||||||4212|1||||data.gff.gz|,C|downstream_gene_variant|MODIFIER||Zm00001d026305|Transcript|Zm00001d026305_T002|protein_coding|||||||||||4212|1||||data.gff.gz|,C|downstream_gene_variant|MODIFIER||Zm00001d026305|Transcript|Zm00001d026305_T003|protein_coding|||||||||||4212|1||||data.gff.gz|,C|dow…
	10	143277015	S_10_143277015	T	TA		CSQ=A|downstream_gene_variant|MODIFIER||Zm00001d026305|Transcript|Zm00001d026305_T001|protein_coding|||||||||||4729|1||||data.gff.gz|,A|downstream_gene_variant|MODIFIER||Zm00001d026305|Transcript|Zm00001d026305_T002|protein_coding|||||||||||4729|1||||data.gff.gz|,A|downstream_gene_variant|MODIFIER||Zm00001d026305|Transcript|Zm00001d026305_T003|protein_coding|||||||||||4729|1||||data.gff.gz|,A|dow…
	10	143277056	S_10_143277056	G	C		CSQ=C|downstream_gene_variant|MODIFIER||Zm00001d026305|Transcript|Zm00001d026305_T001|protein_coding|||||||||||4770|1||||data.gff.gz|,C|downstream_gene_variant|MODIFIER||Zm00001d026305|Transcript|Zm00001d026305_T002|protein_coding|||||||||||4770|1||||data.gff.gz|,C|downstream_gene_variant|MODIFIER||Zm00001d026305|Transcript|Zm00001d026305_T003|protein_coding|||||||||||4770|1||||data.gff.gz|,C|dow…
	10	143277088	S_10_143277088	A	C		CSQ=C|downstream_gene_variant|MODIFIER||Zm00001d026305|Transcript|Zm00001d026305_T001|protein_coding|||||||||||4802|1||||data.gff.gz|,C|downstream_gene_variant|MODIFIER||Zm00001d026305|Transcript|Zm00001d026305_T002|protein_coding|||||||||||4802|1||||data.gff.gz|,C|downstream_gene_variant|MODIFIER||Zm00001d026305|Transcript|Zm00001d026305_T003|protein_coding|||||||||||4802|1||||data.gff.gz|,C|dow…
	10	143277109	S_10_143277109	C	T		CSQ=T|downstream_gene_variant|MODIFIER||Zm00001d026305|Transcript|Zm00001d026305_T001|protein_coding|||||||||||4823|1||||data.gff.gz|,T|downstream_gene_variant|MODIFIER||Zm00001d026305|Transcript|Zm00001d026305_T002|protein_coding|||||||||||4823|1||||data.gff.gz|,T|downstream_gene_variant|MODIFIER||Zm00001d026305|Transcript|Zm00001d026305_T003|protein_coding|||||||||||4823|1||||data.gff.gz|,T|dow…
	10	143277455	S_10_143277455	A	T		CSQ=T|intron_variant|MODIFIER||Zm00001d026306|Transcript|Zm00001d026306_T001|protein_coding||5/20||||||||||-1||||data.gff.gz|,T|intron_variant|MODIFIER||Zm00001d026306|Transcript|Zm00001d026306_T002|protein_coding||7/22||||||||||-1||||data.gff.gz|,T|intron_variant|MODIFIER||Zm00001d026306|Transcript|Zm00001d026306_T003|protein_coding||8/21||||||||||-1||||data.gff.gz|,T|intron_variant|MODIFIER||Zm…
	10	143277458	S_10_143277458	A	C		CSQ=C|intron_variant|MODIFIER||Zm00001d026306|Transcript|Zm00001d026306_T001|protein_coding||5/20||||||||||-1||||data.gff.gz|,C|intron_variant|MODIFIER||Zm00001d026306|Transcript|Zm00001d026306_T002|protein_coding||7/22||||||||||-1||||data.gff.gz|,C|intron_variant|MODIFIER||Zm00001d026306|Transcript|Zm00001d026306_T003|protein_coding||8/21||||||||||-1||||data.gff.gz|,C|intron_variant|MODIFIER||Zm…
	10	143277680	S_10_143277680	A	T		CSQ=T|5_prime_UTR_variant|MODIFIER||Zm00001d026306|Transcript|Zm00001d026306_T001|protein_coding|4/21||||279|||||||-1||||data.gff.gz|,T|5_prime_UTR_variant|MODIFIER||Zm00001d026306|Transcript|Zm00001d026306_T002|protein_coding|6/23||||515|||||||-1||||data.gff.gz|,T|missense_variant|MODERATE||Zm00001d026306|Transcript|Zm00001d026306_T003|protein_coding|7/22||||821|673|225|S/T|Tca/Aca|||-1||||data.…
	10	143277708	S_10_143277708	G	A		CSQ=A|5_prime_UTR_variant|MODIFIER||Zm00001d026306|Transcript|Zm00001d026306_T001|protein_coding|4/21||||251|||||||-1||||data.gff.gz|,A|5_prime_UTR_variant|MODIFIER||Zm00001d026306|Transcript|Zm00001d026306_T002|protein_coding|6/23||||487|||||||-1||||data.gff.gz|,A|synonymous_variant|LOW||Zm00001d026306|Transcript|Zm00001d026306_T003|protein_coding|7/22||||793|645|215|D|gaC/gaT|||-1||||data.gff.g…
	10	143277777	S_10_143277777	G	A		CSQ=A|intron_variant|MODIFIER||Zm00001d026306|Transcript|Zm00001d026306_T001|protein_coding||3/20||||||||||-1||||data.gff.gz|,A|intron_variant|MODIFIER||Zm00001d026306|Transcript|Zm00001d026306_T002|protein_coding||5/22||||||||||-1||||data.gff.gz|,A|intron_variant|MODIFIER||Zm00001d026306|Transcript|Zm00001d026306_T003|protein_coding||6/21||||||||||-1||||data.gff.gz|,A|intron_variant|MODIFIER||Zm…
	10	143277897	S_10_143277897	A	C		CSQ=C|intron_variant|MODIFIER||Zm00001d026306|Transcript|Zm00001d026306_T001|protein_coding||3/20||||||||||-1||||data.gff.gz|,C|intron_variant|MODIFIER||Zm00001d026306|Transcript|Zm00001d026306_T002|protein_coding||5/22||||||||||-1||||data.gff.gz|,C|intron_variant|MODIFIER||Zm00001d026306|Transcript|Zm00001d026306_T003|protein_coding||6/21||||||||||-1||||data.gff.gz|,C|intron_variant|MODIFIER||Zm…
	10	143277989	S_10_143277989	GTTCTA	G		CSQ=-|intron_variant|MODIFIER||Zm00001d026306|Transcript|Zm00001d026306_T001|protein_coding||3/20||||||||||-1||||data.gff.gz|,-|intron_variant|MODIFIER||Zm00001d026306|Transcript|Zm00001d026306_T002|protein_coding||5/22||||||||||-1||||data.gff.gz|,-|intron_variant|MODIFIER||Zm00001d026306|Transcript|Zm00001d026306_T003|protein_coding||6/21||||||||||-1||||data.gff.gz|,-|intron_variant|MODIFIER||Zm…
	10	143278027	S_10_143278027	A	T		CSQ=T|intron_variant|MODIFIER||Zm00001d026306|Transcript|Zm00001d026306_T001|protein_coding||3/20||||||||||-1||||data.gff.gz|,T|intron_variant|MODIFIER||Zm00001d026306|Transcript|Zm00001d026306_T002|protein_coding||5/22||||||||||-1||||data.gff.gz|,T|intron_variant|MODIFIER||Zm00001d026306|Transcript|Zm00001d026306_T003|protein_coding||6/21||||||||||-1||||data.gff.gz|,T|intron_variant|MODIFIER||Zm…
	10	143278088	S_10_143278088	T	C		CSQ=C|intron_variant|MODIFIER||Zm00001d026306|Transcript|Zm00001d026306_T001|protein_coding||3/20||||||||||-1||||data.gff.gz|,C|intron_variant|MODIFIER||Zm00001d026306|Transcript|Zm00001d026306_T002|protein_coding||5/22||||||||||-1||||data.gff.gz|,C|intron_variant|MODIFIER||Zm00001d026306|Transcript|Zm00001d026306_T003|protein_coding||6/21||||||||||-1||||data.gff.gz|,C|intron_variant|MODIFIER||Zm…
	10	143278150	S_10_143278150	G	A		CSQ=A|splice_region_variant&intron_variant|LOW||Zm00001d026306|Transcript|Zm00001d026306_T001|protein_coding||3/20||||||||||-1||||data.gff.gz|,A|splice_region_variant&intron_variant|LOW||Zm00001d026306|Transcript|Zm00001d026306_T002|protein_coding||5/22||||||||||-1||||data.gff.gz|,A|splice_region_variant&intron_variant|LOW||Zm00001d026306|Transcript|Zm00001d026306_T003|protein_coding||6/21|||||||…
	10	143278396	S_10_143278396	T	A		CSQ=A|intron_variant|MODIFIER||Zm00001d026306|Transcript|Zm00001d026306_T001|protein_coding||2/20||||||||||-1||||data.gff.gz|,A|intron_variant|MODIFIER||Zm00001d026306|Transcript|Zm00001d026306_T002|protein_coding||4/22||||||||||-1||||data.gff.gz|,A|intron_variant|MODIFIER||Zm00001d026306|Transcript|Zm00001d026306_T003|protein_coding||5/21||||||||||-1||||data.gff.gz|,A|intron_variant|MODIFIER||Zm…
	10	143278523	S_10_143278523	T	C		CSQ=C|intron_variant|MODIFIER||Zm00001d026306|Transcript|Zm00001d026306_T001|protein_coding||1/20||||||||||-1||||data.gff.gz|,C|intron_variant|MODIFIER||Zm00001d026306|Transcript|Zm00001d026306_T002|protein_coding||3/22||||||||||-1||||data.gff.gz|,C|intron_variant|MODIFIER||Zm00001d026306|Transcript|Zm00001d026306_T003|protein_coding||4/21||||||||||-1||||data.gff.gz|,C|intron_variant|MODIFIER||Zm…
	10	143278590	S_10_143278590	A	C		CSQ=C|intron_variant|MODIFIER||Zm00001d026306|Transcript|Zm00001d026306_T001|protein_coding||1/20||||||||||-1||||data.gff.gz|,C|intron_variant|MODIFIER||Zm00001d026306|Transcript|Zm00001d026306_T002|protein_coding||3/22||||||||||-1||||data.gff.gz|,C|intron_variant|MODIFIER||Zm00001d026306|Transcript|Zm00001d026306_T003|protein_coding||4/21||||||||||-1||||data.gff.gz|,C|intron_variant|MODIFIER||Zm…
	10	143278813	S_10_143278813	G	A		CSQ=A|upstream_gene_variant|MODIFIER||Zm00001d026306|Transcript|Zm00001d026306_T001|protein_coding|||||||||||118|-1||||data.gff.gz|,A|intron_variant|MODIFIER||Zm00001d026306|Transcript|Zm00001d026306_T002|protein_coding||2/22||||||||||-1||||data.gff.gz|,A|intron_variant|MODIFIER||Zm00001d026306|Transcript|Zm00001d026306_T003|protein_coding||3/21||||||||||-1||||data.gff.gz|,A|intron_variant|MODIFI…
	10	143283028	S_10_143283028	A	G		CSQ=G|upstream_gene_variant|MODIFIER||Zm00001d026306|Transcript|Zm00001d026306_T001|protein_coding|||||||||||4333|-1||||data.gff.gz|,G|upstream_gene_variant|MODIFIER||Zm00001d026306|Transcript|Zm00001d026306_T002|protein_coding|||||||||||496|-1||||data.gff.gz|,G|intron_variant|MODIFIER||Zm00001d026306|Transcript|Zm00001d026306_T003|protein_coding||1/21||||||||||-1||||data.gff.gz|,G|intron_variant…
	10	143283067	S_10_143283067	G	GGCCA		CSQ=GCCA|upstream_gene_variant|MODIFIER||Zm00001d026306|Transcript|Zm00001d026306_T001|protein_coding|||||||||||4372|-1||||data.gff.gz|,GCCA|upstream_gene_variant|MODIFIER||Zm00001d026306|Transcript|Zm00001d026306_T002|protein_coding|||||||||||535|-1||||data.gff.gz|,GCCA|intron_variant|MODIFIER||Zm00001d026306|Transcript|Zm00001d026306_T003|protein_coding||1/21||||||||||-1||||data.gff.gz|,GCCA|in…
	10	143283294	S_10_143283294	GAAGATGGTCCGGGGGTCGATCCAGGCCTCATCGTCTCCTT	G		CSQ=-|upstream_gene_variant|MODIFIER||Zm00001d026306|Transcript|Zm00001d026306_T001|protein_coding|||||||||||4600|-1||||data.gff.gz|,-|upstream_gene_variant|MODIFIER||Zm00001d026306|Transcript|Zm00001d026306_T002|protein_coding|||||||||||763|-1||||data.gff.gz|,-|start_lost&5_prime_UTR_variant|HIGH||Zm00001d026306|Transcript|Zm00001d026306_T003|protein_coding|1/22||||140-179|?-31|?-11|||||-1||||da…
	10	143283409	S_10_143283409	T	C		CSQ=C|upstream_gene_variant|MODIFIER||Zm00001d026306|Transcript|Zm00001d026306_T001|protein_coding|||||||||||4714|-1||||data.gff.gz|,C|upstream_gene_variant|MODIFIER||Zm00001d026306|Transcript|Zm00001d026306_T002|protein_coding|||||||||||877|-1||||data.gff.gz|,C|5_prime_UTR_variant|MODIFIER||Zm00001d026306|Transcript|Zm00001d026306_T003|protein_coding|1/22||||65|||||||-1||||data.gff.gz|,C|5_prime…
	10	143283440	S_10_143283440	A	G		CSQ=G|upstream_gene_variant|MODIFIER||Zm00001d026306|Transcript|Zm00001d026306_T001|protein_coding|||||||||||4745|-1||||data.gff.gz|,G|upstream_gene_variant|MODIFIER||Zm00001d026306|Transcript|Zm00001d026306_T002|protein_coding|||||||||||908|-1||||data.gff.gz|,G|5_prime_UTR_variant|MODIFIER||Zm00001d026306|Transcript|Zm00001d026306_T003|protein_coding|1/22||||34|||||||-1||||data.gff.gz|,G|5_prime…
	10	143284659	S_10_143284659	A	AT		CSQ=T|upstream_gene_variant|MODIFIER||Zm00001d026306|Transcript|Zm00001d026306_T002|protein_coding|||||||||||2127|-1||||data.gff.gz|,T|upstream_gene_variant|MODIFIER||Zm00001d026306|Transcript|Zm00001d026306_T003|protein_coding|||||||||||1186|-1||||data.gff.gz|,T|upstream_gene_variant|MODIFIER||Zm00001d026306|Transcript|Zm00001d026306_T004|protein_coding|||||||||||1186|-1||||data.gff.gz|,T|upstre…
Zm00001d026297	10	143166920	S_10_143166920	G	GAC		CSQ=AC|upstream_gene_variant|MODIFIER||Zm00001d026297|Transcript|Zm00001d026297_T001|protein_coding|||||||||||1781|-1||||data.gff.gz|,AC|upstream_gene_variant|MODIFIER||Zm00001d026298|Transcript|Zm00001d026298_T001|protein_coding|||||||||||1735|1||||data.gff.gz|
	10	143167022	S_10_143167022	G	A		CSQ=A|upstream_gene_variant|MODIFIER||Zm00001d026297|Transcript|Zm00001d026297_T001|protein_coding|||||||||||1883|-1||||data.gff.gz|,A|upstream_gene_variant|MODIFIER||Zm00001d026298|Transcript|Zm00001d026298_T001|protein_coding|||||||||||1634|1||||data.gff.gz|
	10	143167046	S_10_143167046	T	C		CSQ=C|upstream_gene_variant|MODIFIER||Zm00001d026297|Transcript|Zm00001d026297_T001|protein_coding|||||||||||1907|-1||||data.gff.gz|,C|upstream_gene_variant|MODIFIER||Zm00001d026298|Transcript|Zm00001d026298_T001|protein_coding|||||||||||1610|1||||data.gff.gz|
	10	143167071	S_10_143167071	A	G		CSQ=G|upstream_gene_variant|MODIFIER||Zm00001d026297|Transcript|Zm00001d026297_T001|protein_coding|||||||||||1932|-1||||data.gff.gz|,G|upstream_gene_variant|MODIFIER||Zm00001d026298|Transcript|Zm00001d026298_T001|protein_coding|||||||||||1585|1||||data.gff.gz|
	10	143167365	S_10_143167365	A	AGGCTACCTACT		CSQ=GGCTACCTACT|upstream_gene_variant|MODIFIER||Zm00001d026297|Transcript|Zm00001d026297_T001|protein_coding|||||||||||2226|-1||||data.gff.gz|,GGCTACCTACT|upstream_gene_variant|MODIFIER||Zm00001d026298|Transcript|Zm00001d026298_T001|protein_coding|||||||||||1290|1||||data.gff.gz|
	10	143167391	S_10_143167391	T	C		CSQ=C|upstream_gene_variant|MODIFIER||Zm00001d026297|Transcript|Zm00001d026297_T001|protein_coding|||||||||||2252|-1||||data.gff.gz|,C|upstream_gene_variant|MODIFIER||Zm00001d026298|Transcript|Zm00001d026298_T001|protein_coding|||||||||||1265|1||||data.gff.gz|
	10	143167564	S_10_143167564	A	ATTTG		CSQ=TTTG|upstream_gene_variant|MODIFIER||Zm00001d026297|Transcript|Zm00001d026297_T001|protein_coding|||||||||||2425|-1||||data.gff.gz|,TTTG|upstream_gene_variant|MODIFIER||Zm00001d026298|Transcript|Zm00001d026298_T001|protein_coding|||||||||||1091|1||||data.gff.gz|
	10	143168517	S_10_143168517	TTAAA	T		CSQ=-|upstream_gene_variant|MODIFIER||Zm00001d026297|Transcript|Zm00001d026297_T001|protein_coding|||||||||||3379|-1||||data.gff.gz|,-|upstream_gene_variant|MODIFIER||Zm00001d026298|Transcript|Zm00001d026298_T001|protein_coding|||||||||||135|1||||data.gff.gz|
	10	143168633	S_10_143168633	G	C		CSQ=C|upstream_gene_variant|MODIFIER||Zm00001d026297|Transcript|Zm00001d026297_T001|protein_coding|||||||||||3494|-1||||data.gff.gz|,C|upstream_gene_variant|MODIFIER||Zm00001d026298|Transcript|Zm00001d026298_T001|protein_coding|||||||||||23|1||||data.gff.gz|
	10	143168684	S_10_143168684	AG	A		CSQ=-|upstream_gene_variant|MODIFIER||Zm00001d026297|Transcript|Zm00001d026297_T001|protein_coding|||||||||||3546|-1||||data.gff.gz|,-|5_prime_UTR_variant|MODIFIER||Zm00001d026298|Transcript|Zm00001d026298_T001|protein_coding|1/3||||30|||||||1||||data.gff.gz|
	10	143168938	S_10_143168938	C	T		CSQ=T|upstream_gene_variant|MODIFIER||Zm00001d026297|Transcript|Zm00001d026297_T001|protein_coding|||||||||||3799|-1||||data.gff.gz|,T|synonymous_variant|LOW||Zm00001d026298|Transcript|Zm00001d026298_T001|protein_coding|2/3||||173|66|22|C|tgC/tgT|||1||||data.gff.gz|
	10	143169001	S_10_143169001	C	T		CSQ=T|upstream_gene_variant|MODIFIER||Zm00001d026297|Transcript|Zm00001d026297_T001|protein_coding|||||||||||3862|-1||||data.gff.gz|,T|intron_variant|MODIFIER||Zm00001d026298|Transcript|Zm00001d026298_T001|protein_coding||2/2||||||||||1||||data.gff.gz|
	10	143169622	S_10_143169622	G	A		CSQ=A|upstream_gene_variant|MODIFIER||Zm00001d026297|Transcript|Zm00001d026297_T001|protein_coding|||||||||||4483|-1||||data.gff.gz|,A|missense_variant|MODERATE||Zm00001d026298|Transcript|Zm00001d026298_T001|protein_coding|3/3||||717|610|204|V/M|Gtg/Atg|||1||||data.gff.gz|
	10	143169889	S_10_143169889	T	C		CSQ=C|upstream_gene_variant|MODIFIER||Zm00001d026297|Transcript|Zm00001d026297_T001|protein_coding|||||||||||4750|-1||||data.gff.gz|,C|3_prime_UTR_variant|MODIFIER||Zm00001d026298|Transcript|Zm00001d026298_T001|protein_coding|3/3||||984|||||||1||||data.gff.gz|
	10	143169988	S_10_143169988	A	G		CSQ=G|upstream_gene_variant|MODIFIER||Zm00001d026297|Transcript|Zm00001d026297_T001|protein_coding|||||||||||4849|-1||||data.gff.gz|,G|3_prime_UTR_variant|MODIFIER||Zm00001d026298|Transcript|Zm00001d026298_T001|protein_coding|3/3||||1083|||||||1||||data.gff.gz|
	10	143169999	S_10_143169999	G	A		CSQ=A|upstream_gene_variant|MODIFIER||Zm00001d026297|Transcript|Zm00001d026297_T001|protein_coding|||||||||||4860|-1||||data.gff.gz|,A|3_prime_UTR_variant|MODIFIER||Zm00001d026298|Transcript|Zm00001d026298_T001|protein_coding|3/3||||1094|||||||1||||data.gff.gz|
Note: SNP is single nucleotide polymorphism; InDel is Insertion/Deletion.

## Sheet: Table S8
Table S8. Primers of RT-qPCR.
Name	Primer	Primer sequence
Zm00001d005293	F	CGGAAATAAGCGTAAGCACG
	R	CGGAAATAAGCGTAAGCACG
ACTIN	ActF	TACCATGTTCCCTGGGATTG
	ActR	GTGGCGCAATCACTTTAACC
Note:Actin,reference gene
